# Supplementary material for: Reductive amination of bio-based 2-hydroxytetrahydropyran to 5-Amino-1-pentanol over nano-Ni–Al2O3 catalysts
Source: Royal Society of Chemistry journal article supplement (doi:10.1039/d0nj04962j), 2021-01-01
Supplement: d0nj04962j7.pdf [file d0nj04962j7.pdf]

## Supporting Information

### Reductive amination of bio-based 2-hydroxytetrahydropyran to 5-Amino-1-pentanol over nano-Ni-Al<sub>2</sub>O<sub>3</sub> catalysts

Jia Zhang,<sup>a,b</sup> Jian Yang,<sup>a,b</sup> Junying Tian,<sup>a</sup> Hailong Liu,<sup>a</sup> Xuemei Li,<sup>a</sup> Weiguo Fang,<sup>a</sup> Xun Hu,<sup>a</sup>  
Chungu Xia,<sup>a</sup> Jing Chen<sup>a</sup> and Zhiwei Huang<sup>\*a</sup>

<sup>a</sup> State Key Laboratory for Oxo Synthesis and Selective Oxidation, Suzhou Research Institute of LICP, Lanzhou Institute of Chemical Physics (LICP), Chinese Academy of Sciences, Lanzhou 730000, China

<sup>b</sup> University of Chinese Academy of Sciences, Beijing 100049, China

\* Corresponding author, E-mail: [zwhuang@licp.cas.cn](mailto:zwhuang@licp.cas.cn), Fax: +86-931-4968129

#### Table of contents

**Figure S1** XRD patterns of the dried Ni-Al<sub>2</sub>O<sub>3</sub> samples with different Ni loadings from 10-90 wt%.

**Figure S2** The representative picture of the calcined NiO-Al<sub>2</sub>O<sub>3</sub> samples with (A) 10NiO-Al<sub>2</sub>O<sub>3</sub>, (B) 30NiO-Al<sub>2</sub>O<sub>3</sub> and (C) 70NiO-Al<sub>2</sub>O<sub>3</sub>.

**Figure S3** Pore size distributions of xNi-Al<sub>2</sub>O<sub>3</sub> with different Ni contents.

**Figure S4** HAADF-STEM image of the representative 50Ni-Al<sub>2</sub>O<sub>3</sub> and 90Ni-Al<sub>2</sub>O<sub>3</sub> catalysts and the corresponding EDX elemental mappings of Ni, Al and O.

**Figure S5** FT-IR spectra of pyridine on the representative 50Ni-Al<sub>2</sub>O<sub>3</sub> catalyst at different temperatures.

**Figure S6** XRD (A) and XPS (B) analysis of the used 50Ni-Al<sub>2</sub>O<sub>3</sub> catalyst after 150 h time-on-stream along with the reduced 50Ni-Al<sub>2</sub>O<sub>3</sub> catalyst.

**Table S1** Reductive amination of biomass-derived aldehydes and ketones over Ni-Al<sub>2</sub>O<sub>3</sub> catalyst.

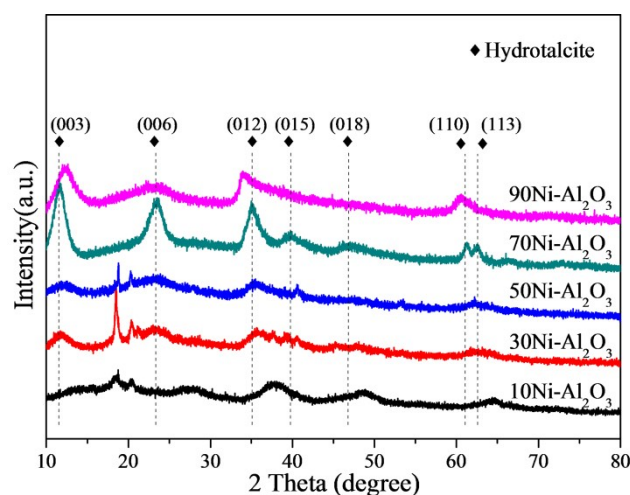

Figure S1. XRD patterns of the dried Ni-Al<sub>2</sub>O<sub>3</sub> samples with different Ni loadings from 10-90 wt%.

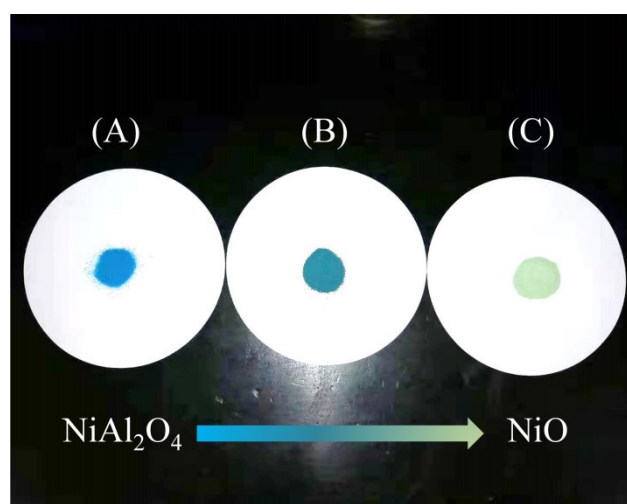

Figure S2. The picture of the calcined NiO-Al<sub>2</sub>O<sub>3</sub> samples with (A) 10NiO-Al<sub>2</sub>O<sub>3</sub>, (B) 30NiO-Al<sub>2</sub>O<sub>3</sub> and (C) 70NiO-Al<sub>2</sub>O<sub>3</sub>.

As shown in Figure S2, the color of the 10NiO-Al<sub>2</sub>O<sub>3</sub> sample is blue, implying the formation of NiAl<sub>2</sub>O<sub>4</sub>, and then the color of the calcined samples gradually changed from blue to dark green or light green with increased Ni loadings, indicating that larger amount of NiO present in the Ni-rich samples, which further confirmed by XPS characterization.<sup>1-3</sup>

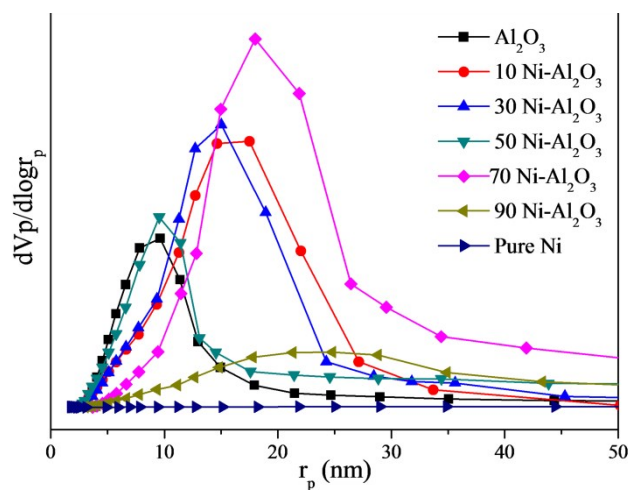

Figure S3. Pore size distributions of  $x\text{Ni-Al}_2\text{O}_3$  with different Ni contents.

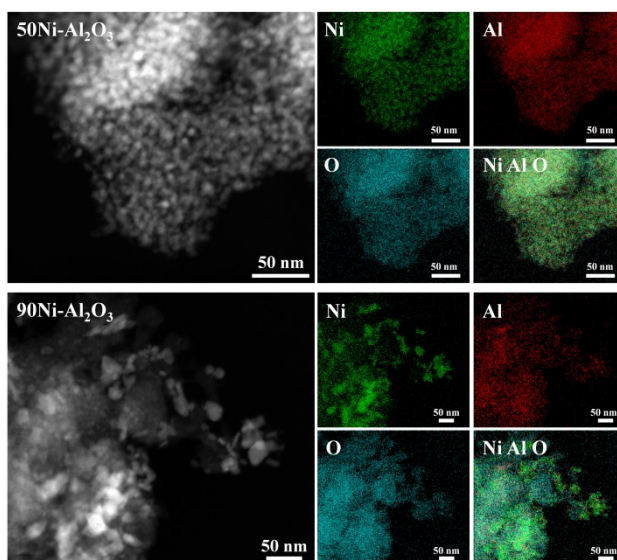

Figure S4. HAADF-STEM image of the representative 50Ni- $\text{Al}_2\text{O}_3$  and 90Ni- $\text{Al}_2\text{O}_3$  catalysts and the corresponding EDX elemental mappings of Ni, Al and O.

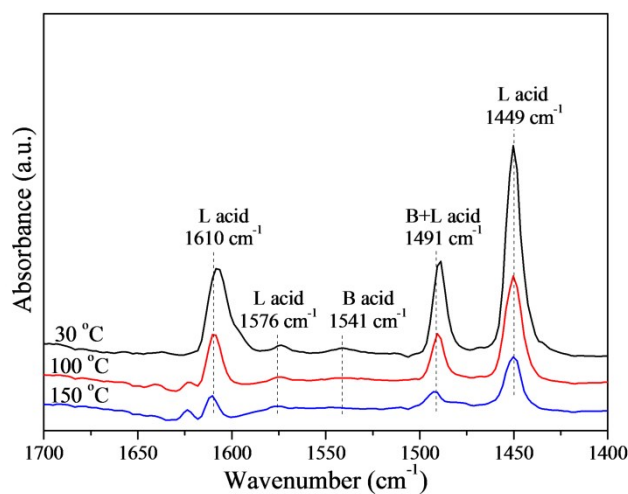

Figure S5. FT-IR spectra of pyridine on the representative 50Ni- $\text{Al}_2\text{O}_3$  catalyst at different

temperatures.

It can be seen from Figure S5 that the obvious IR peaks around 1449 and 1610  $\text{cm}^{-1}$  due to characteristic of abundant Lewis acid sites, while 1491  $\text{cm}^{-1}$  was assigned to both Brønsted and Lewis acidic sites. There are almost no Brønsted acid sites for the catalyst.<sup>4,5</sup>

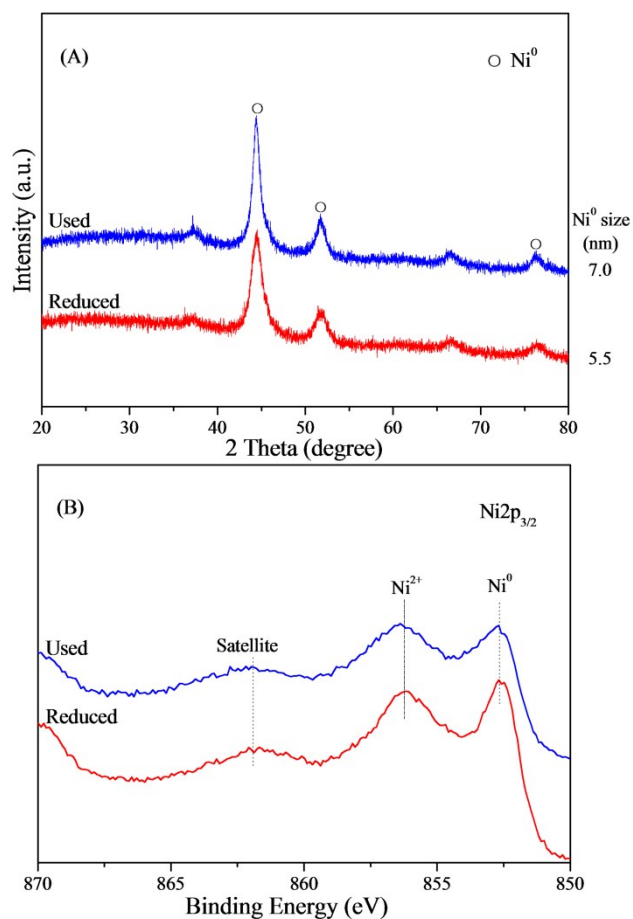

Figure S6. XRD (A) and XPS (B) analysis of the used 50Ni-Al<sub>2</sub>O<sub>3</sub> catalyst after 150 h time-on-stream along with the reduced 50Ni-Al<sub>2</sub>O<sub>3</sub> catalyst.

Table S1 Reductive amination of biomass-derived aldehydes and ketones over Ni-Al<sub>2</sub>O<sub>3</sub> catalyst.

| Entry | Substrate                                                                         | Products                                                                          | Yield (%) | Optimized conditions                                                                                                       |
|-------|-----------------------------------------------------------------------------------|-----------------------------------------------------------------------------------|-----------|----------------------------------------------------------------------------------------------------------------------------|
| 1     |  |  | 89        | 10 wt% reactant solution (3 g substrate, 27 g 25 wt% aqueous ammonia), 60 °C, 4 MPa H <sub>2</sub> , 1 h.                  |
| 2     |  |  | 99        | 10 wt% reactant solution (3 g substrate, 27 g 25 wt% aqueous ammonia), 60 °C, 2 MPa H <sub>2</sub> , 1 h.                  |
| 3     |  |  | 88        | 5 wt% reactant solution (1.5 g substrate, 6 g ethanol, 22.5 g 25 wt% aqueous ammonia), 80 °C, 2 MPa H <sub>2</sub> , 10 h. |
| 4     |  |  | 99        | 10 wt% reactant solution (3 g substrate, 3 g ethanol, 24 g 25 wt% aqueous ammonia), 80 °C, 2 MPa H <sub>2</sub> , 2 h.     |
| 5     |  |  | 97        | 10 wt% reactant solution (3 g substrate, 3 g ethanol, 24 g 25 wt% aqueous ammonia), 80 °C, 4 MPa H <sub>2</sub> , 2 h.     |

[a] Reaction conditions: 0.1 g catalyst.

## Reference

1. F. Rahbar Shamskar, M. Rezaei and F. Meshkani, *Int. J. Hydrogen Energy*, 2017, **42**, 4155-4164.
2. C. Jiménez-González, Z. Boukha, B. de Rivas, J. J. Delgado, M. Á. Cauqui, J. R. González-Velasco, J. I. Gutiérrez-Ortiz and R. López-Fonseca, *Appl. Catal., A*, 2013, **466**, 9-20.
3. C. Jiménez-González, Z. Boukha, B. de Rivas, J. R. González-Velasco, J. I. Gutiérrez-Ortiz and R. López-Fonseca, *Energy Fuels*, 2014, **28**, 7109-7121.
4. J. Zhang, Z. An, Y. Zhu, X. Shu, H. Song, Y. Jiang, W. Wang, X. Xiang, L. Xu and J. He, *ACS Catal.*, 2019, **9**, 11438-11446.
5. Y. Shao, K. Sun, Q. Li, Q. Liu, S. Zhang, Q. Liu, G. Hu and X. Hu, *Green Chem.*, 2019, **21**, 4499-4511.
