# Supplementary figures and images for: Reductive amination of bio-based 2-hydroxytetrahydropyran to 5-Amino-1-pentanol over nano-Ni–Al2O3 catalysts
Source: Royal Society of Chemistry journal article supplement (doi:10.1039/d0nj04962j), 2021-01-01

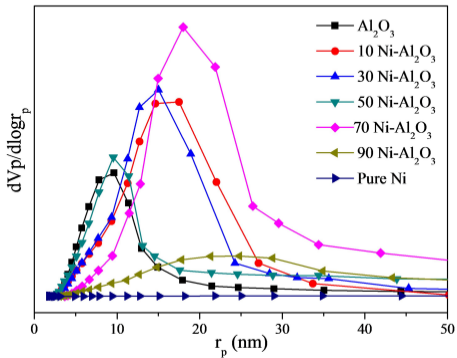

Supplement: d0nj04962j3.pdf [file d0nj04962j3.pdf]
